# Supplementary material for: Targeting circDGKD Intercepts TKI’s Effects on Up-Regulation of Estrogen Receptor β and Vasculogenic Mimicry in Renal Cell Carcinoma
Source: MDPI journal article supplement (doi:10.3390/cancers14071639), 2022-03-23

# Supplementary Materials

S1

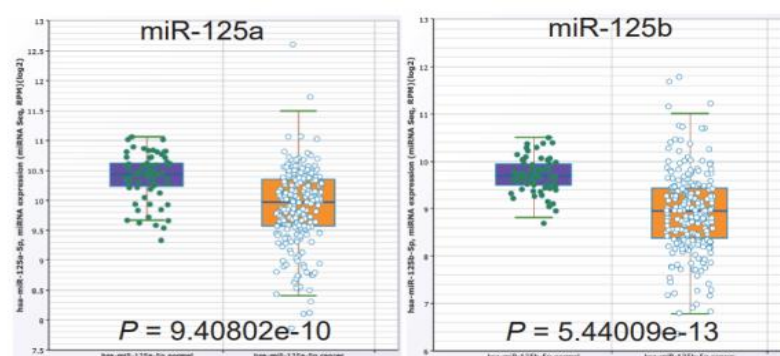

**Figure S1.** Clinical data from Starbase confirmed the down-regulation of miR-125a-5p and miR-125b-5p in ccRCC patients.

S2

| name            | mirAccession | geneName                 | targetSites | bioComplex | clipReadNum |
|-----------------|--------------|--------------------------|-------------|------------|-------------|
| hsa-miR-125b-5p | MIMAT0000423 | DGKD_hsa_circ_001411     | 1           | 2          | 132         |
| hsa-miR-125b-5p | MIMAT0000423 | BPTF_hsa_circ_001730     | 1           | 1          | 1           |
| hsa-miR-125b-5p | MIMAT0000423 | DHPS_hsa_circ_000261     | 1           | 2          | 12          |
| hsa-miR-125b-5p | MIMAT0000423 | ERBB2IP_hsa_circ_001427  | 1           | 4          | 75          |
| hsa-miR-125b-5p | MIMAT0000423 | APOBEC3C_hsa_circ_001120 | 1           | 1          | 11          |
| hsa-miR-125b-5p | MIMAT0000423 | RNF38_hsa_circ_001613    | 1           | 1          | 6           |
| hsa-miR-125b-5p | MIMAT0000423 | ANKIB1_hsa_circ_001193   | 1           | 3          | 23          |
| hsa-miR-125b-5p | MIMAT0000423 | ADPGK_hsa_circ_000607    | 1           | 3          | 13          |
| hsa-miR-125b-5p | MIMAT0000423 | BAZ1B_hsa_circ_001192    | 1           | 4          | 22          |
| hsa-miR-125b-5p | MIMAT0000423 | MLL3_hsa_circ_000753     | 1           | 2          | 2454        |
| hsa-miR-125b-5p | MIMAT0000423 | ELF2_hsa_circ_001518     | 1           | 1          | 446         |

**Figure S2.** Starbase analysis result of the top 10 potential circRNA candidates that might sponge miR-125-5p. Due to information mismatch between Starbase and Circbase for MLL3, the original 11<sup>th</sup> ELF2 was chosen to be among the top 10 candidates.

S3

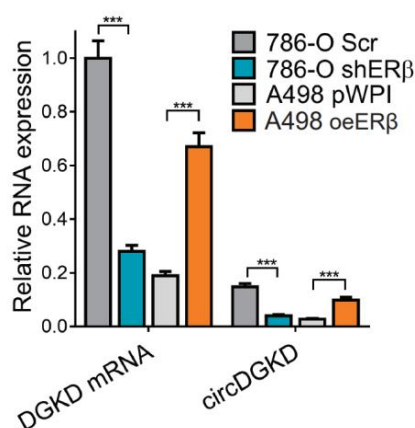

**Figure S3.** qPCR of the expressions of DGKD mRNA and circDGKD after knocking down ERβ in 786-O cells (shERβ vs. Scramble control), or the overexpressing ERβ in A498 cells (oeERβ vs. pWPI vector control). Data are presented as mean ± SEM. \*\*\* p < 0.001.

Uncropped Western Blots

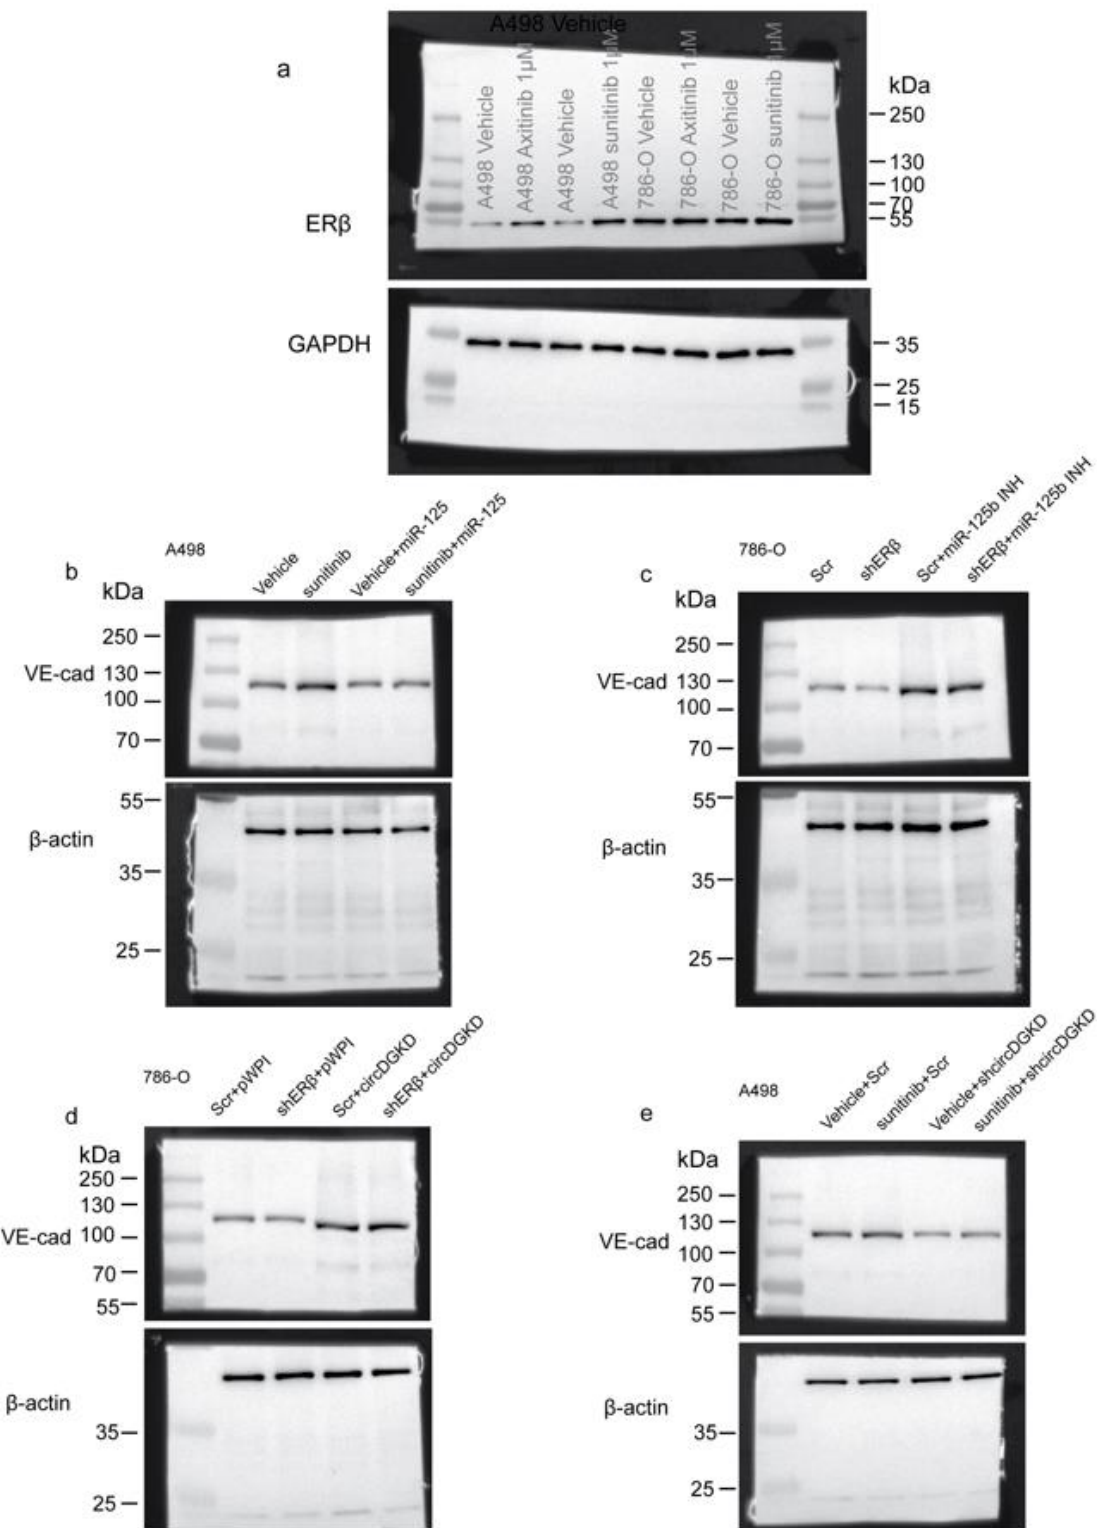

Supplement: s1 [file s1]
